# Supplementary material for: Visual fluorescence detection of H2O2 and glucose based on “molecular beacon”-hosted Hoechst dyes
Source: Royal Society of Chemistry journal article supplement (doi:10.1039/c5an00499c), 2015-01-01
Supplement: c5an00499c1.pdf [file c5an00499c1.pdf]

## SUPPLEMENTARY INFORMATION

# Visual fluorescent detection of H<sub>2</sub>O<sub>2</sub> and glucose based on “molecular beacon”-hosted Hoechst dyes

Ling-Fei Lu, Yan-Yun Li, Min Zhang,\* and Guoyue Shi\*

Department of Chemistry, School of Chemistry and Molecular Engineering, East China Normal University, 500 Dongchuan Road, Shanghai, 200241, P. R. China.

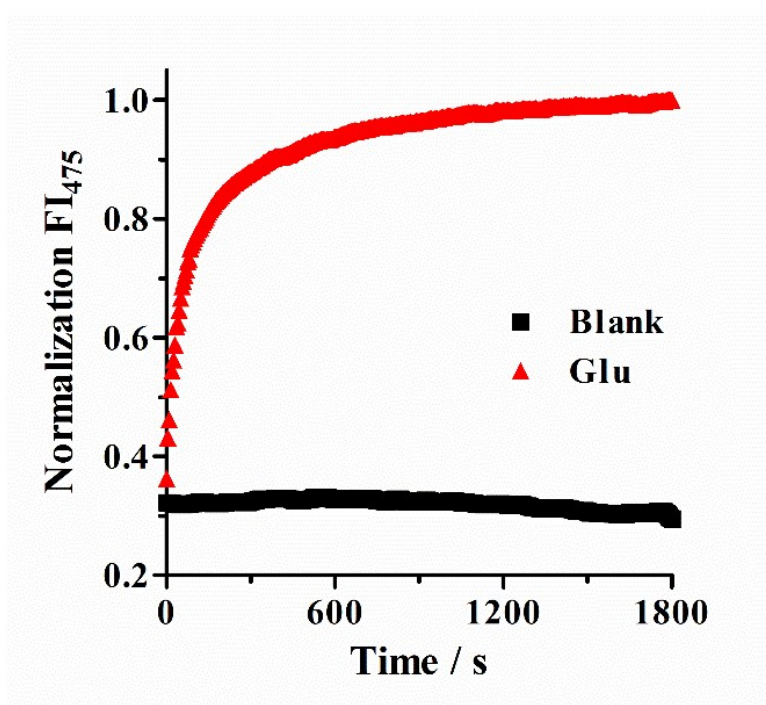

**Fig. S1** Kinetics investigation of fluorescent response of the Hg<sup>2+</sup>/ATprobe/Hoechst-Cys-GOx system toward glucose at a fixed concentration of 100 μM.

**Table S1.** The analytical performance of various glucose sensors.

| Sensing materials                         | Signal output    | LOD ( $\mu\text{M}$ ) | Linear range ( $\mu\text{M}$ ) | Ref.      |
|-------------------------------------------|------------------|-----------------------|--------------------------------|-----------|
| AuNP                                      | Colorimetry      | 1                     | 0-131                          | 1         |
| GQDs                                      | Colorimetry      | 0.5                   | 0.5-1000                       | 2         |
| rGO/AgNPs                                 | Electrochemistry | 4.5                   | 32-1890                        | 3         |
| GQDs/CCE                                  | Electrochemistry | 1.73                  | 5-1270                         | 4         |
| Si-QDs                                    | Fluorimetry      | 0.68                  | 5-650                          | 5         |
| C-Dots                                    | Fluorimetry      | 1.5                   | 9-900                          | 6         |
| AgNPs-DNA@GQDs                            | Fluorimetry      | 0.42                  | 2-100                          | 7         |
| GQDs                                      | Fluorimetry      | 30                    | 100-10000                      | 8         |
| Hg <sup>2+</sup> /ATprobe/Hoechst-Cys-GOx | Fluorimetry      | 0.1                   | 0-10                           | This work |

### Analysis of glucose in artificial saliva samples

The glucose concentration in saliva has been found to be in a micromole range from 8 to 210  $\mu\text{M}$ .<sup>9</sup> Artificial saliva samples were prepared according to the reported method.<sup>10</sup> Artificial saliva consisted of the following components added to 50 mL water: 48 mg sodium chloride, 28 mg sodium phosphate dibasic, 28 mg monopotassium phosphate, 25 mg magnesium chloride, 124 mg potassium bicarbonate, 18 mg calcium chloride and 39 mg citric acid. The pH of the solution was subsequently adjusted to 6.7.

**Table S2.** Determination results of glucose in spiked saliva samples (n = 3).

| Saliva sample | Glucose found ( $\mu\text{M}$ ) | Glucose spiking ( $\mu\text{M}$ ) | Total found ( $\mu\text{M}$ ) | Recovery (%) | RSD (%) |
|---------------|---------------------------------|-----------------------------------|-------------------------------|--------------|---------|
| 1             | ND <sup>a</sup>                 | 10.00                             | 10.13                         | 101.30       | 3.23    |
| 2             | ND                              | 50.00                             | 48.84                         | 97.68        | 1.35    |
| 3             | ND                              | 100.00                            | 100.19                        | 100.19       | 1.74    |

a) Not detected.

### Analysis of glucose in artificial urine samples

An artificial urine solution was prepared according to the recipe reported by Brooks and Keevil.<sup>11</sup> The artificial urine solution contained 170 mM urea, 25 mM sodium bicarbonate, 1.1 mM lactic acid, 2.0 mM citric acid, 2.5 mM calcium chloride, 90 mM sodium chloride, 2.0 mM magnesium sulfate, 10 mM sodium sulfate, 7.0 mM potassium dihydrogen phosphate, 7.0 mM dipotassium hydrogen phosphate, and 25 mM ammonium chloride and all mixed in Milli-Q water, and the pH of the solution was adjusted to 6.0 by the addition of 1.0 M hydrochloric acid.

**Table S3.** Determination results of glucose in spiked urine samples (n = 3).

| Urine sample | Glucose found ( $\mu\text{M}$ ) | Glucose spiking ( $\mu\text{M}$ ) | Total found ( $\mu\text{M}$ ) | Recovery (%) | RSD (%) |
|--------------|---------------------------------|-----------------------------------|-------------------------------|--------------|---------|
| 1            | ND <sup>a</sup>                 | 10.00                             | 10.34                         | 103.40       | 0.93    |
| 2            | ND                              | 50.00                             | 54.62                         | 109.20       | 2.43    |
| 3            | ND                              | 100.00                            | 100.72                        | 100.70       | 1.16    |

a) Not detected.

**Reference:**

- (1) C. Xu, J. S. Ren, L. Y. Feng and Qu, X. G. *Chem. Commun.* **2012**, 48, 3739-3741.
- (2) A. X. Zheng, Z. X. Cong, J. R. Wang, J. Li, H. H. Yang and G. N. Chen, *Biosens. Bioelectron.* **2013**, 41, 519-524.
- (3) Z. Luo, L. Yuwen, Y. Han, J. Tian, X. Zhu, L. Weng and L. Wang, *Biosens. Bioelectron.* **2012**, 36, 179-185.
- (4) R. Habib and M. R. Rahim, *Biosens. Bioelectron.* **2013**, 41, 498-504.
- (5) Y. H. Yi, J. H. Deng, Y. Y. Zhang, H. T. Li and S. Z. Yao, *Chem. Commun.* **2013**, 49, 612-614.
- (6) P. F. Shen and Y. S. Xia, *Anal. Chem.* **2014**, 86, 5323-5329.
- (7) L. Wang, J. Zheng, Y. Li, S. Yang, C. Liu, Y. Xiao and J. Li, C. Zhong and R. Yang, *Anal. Chem.* **2014**, 86, 12348-12354.
- (8) L. Zhang, Z. Y. Zhang, R. P. Liang, Y. H. Li and J. D. Qiu, *Anal. Chem.* **2014**, 86, 4423-4430.
- (9) M. Yamaguchi, M. Mitsumori, Y. Kano, *Eng. Med. Biol. Mag., IEEE* **1998**, 17, 59-63.
- (10) a) K. Arvidson, E. G. Johansson, *Eur. J. Oral Sci.* **1985**, 93, 467-473; b) R. A. Hunter, W. L. Storm, P. N. Coneski, M. H. Schoenfisch, *Anal. Chem.* **2013**, 85, 1957-1963.
- (11) Brooks, T., Keevil, C. W. *Lett. Appl. Microbiol.* **1997**, 24, 203-206.
